# Supplementary material for: A fluorescent biosensor based on boronic acid functionalized carbon dots for identification and sensitive detection of Gram-positive bacteria
Source: Royal Society of Chemistry journal article supplement (doi:10.1039/d4nj02796e), 2024-01-01
Supplement: d4nj02796e1.pdf [file d4nj02796e1.pdf]

## **Supplementary Information**

### **A fluorescent biosensor based on boronic acid functionalized carbon dots for identification and sensitive detection of Gram-positive bacteria**

Xiaoqing Zhang <sup>a</sup>, Yue Ma <sup>a</sup>, Lingling Zhao <sup>a</sup>, Mei Liu <sup>a\*</sup>

<sup>a</sup> College of Food Engineering and Nutritional Science, Shaanxi Normal University, Xi'an 710119

\*Corresponding author

E-mail: [liumei@snnu.edu.cn](mailto:liumei@snnu.edu.cn)

Phone: 86-29-85310517, Fax: 86-29-85310517

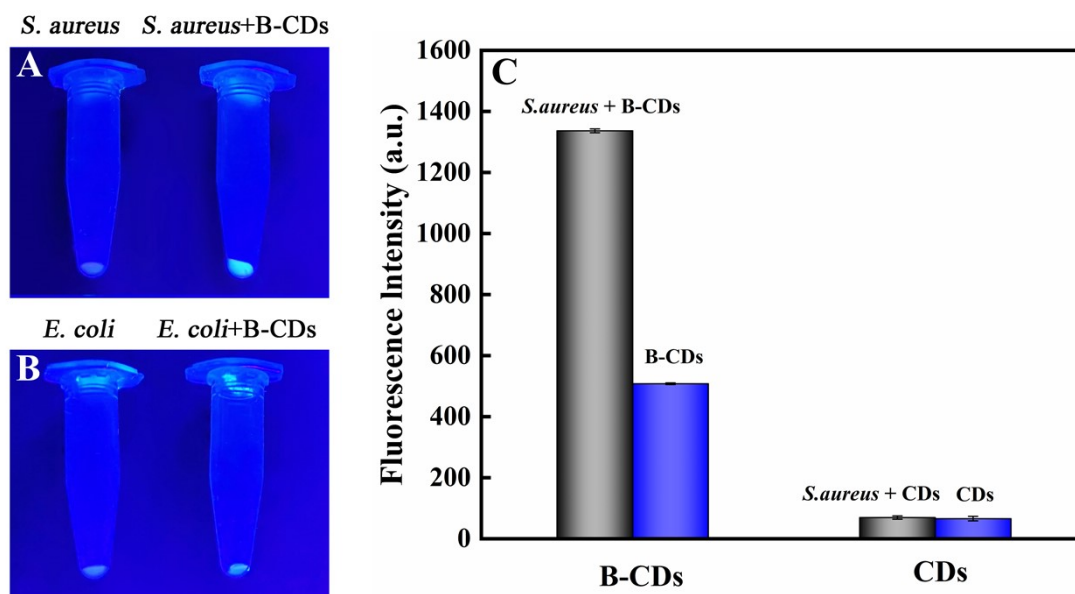

**Fig. S1** Photographs of *S. aureus*(A) and *E. coli* cell pellets (B) before and after B-CDs treatment under 365 nm UV light; (C) Comparison of the ability of B-CDs and e-CDs to recognize *S. aureus*.

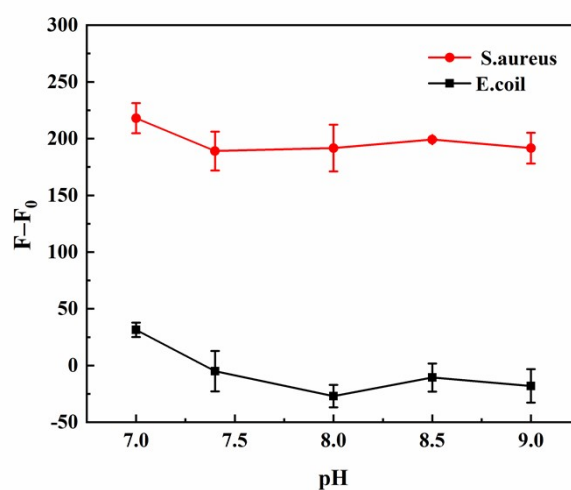

**Fig. S2** The ability of B-CDs to recognize *S. aureus* and *E. coli* in different pH environment.

To investigate the effect of B-CDs on the recognition of Gram-positive bacteria in common pH environment, the fluorescence intensity of the precipitated resuspension was measured by incubating B-CDs with the same concentrations of *S. aureus* and *E. coli* at pH 7.0-9.0, respectively. Results in Fig. S2 demonstrated that pH environment had no significant influence on the recognition of B-CDs to Gram-positive bacteria.

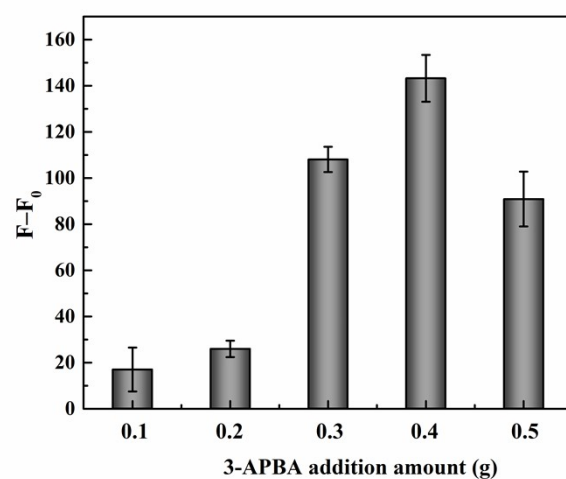

**Fig. S3** The effect of different dosage of precursor substance (3-APBA) on the ability to detect *S. aureus*.

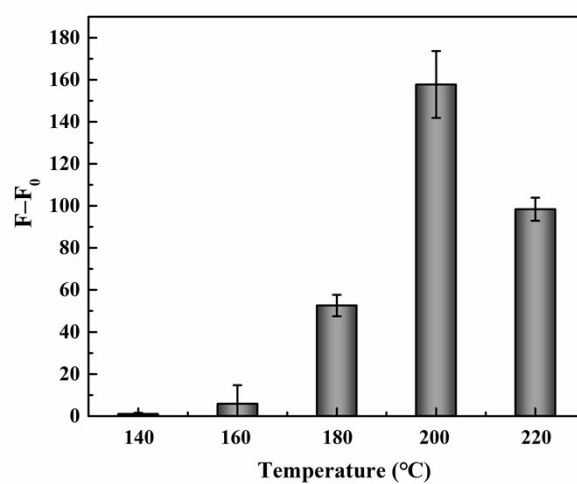

**Fig. S4** The effect of B-CDs synthesis temperature on its ability to detect *S. aureus*.

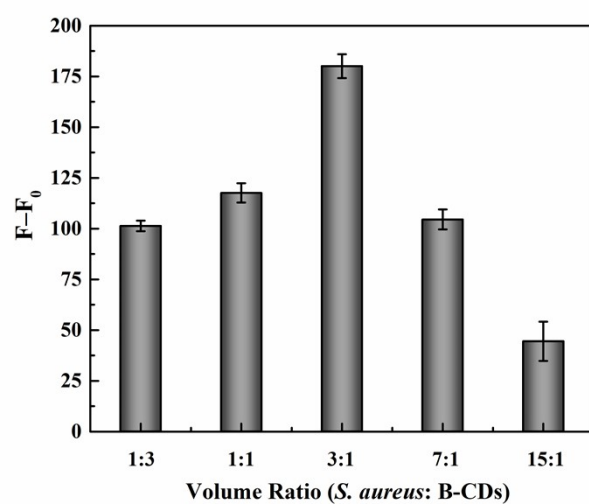

**Fig. S5** Influence of the mixed volume ratio of bacterial suspension and B-CDs on the detection effect.

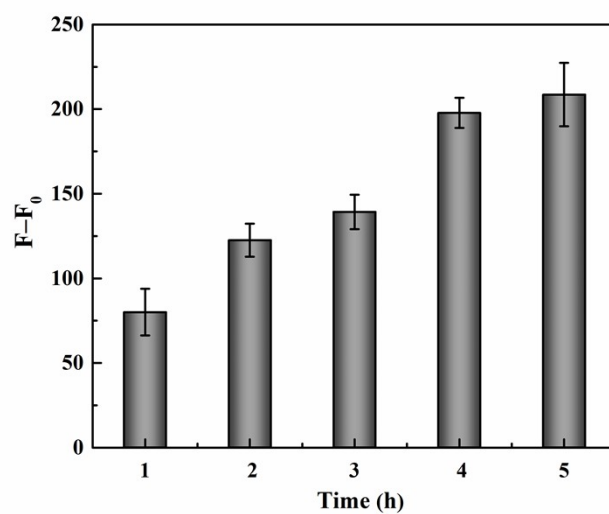

**Fig. S6** Influence of the incubation time of bacterial suspension with B-CDs on the detection effect.

**Table S1** Comparison of the developed biosensor with other reported methods for the determination of *S. aureus*.

| Detection<br>method            | Linear Range<br>(CFU/mL)                | LOD<br>(CFU/mL)   | Reference        |
|--------------------------------|-----------------------------------------|-------------------|------------------|
| Immunochromatographic<br>assay | $10^2\text{--}10^6$                     | $10^2$            | 1                |
| Colorimetric assay             | $10\text{--}10^6$                       | 10                | 2                |
| Electrochemical assay          | $10^1\text{--}10^7$                     | 10                | 3                |
| Fluorescence method            | $5.6\times 10^1\text{--}5.6\times 10^6$ | 22                | 4                |
| Fluorescence method            | $10^4\text{--}10^8$                     | $2.24\times 10^2$ | 5                |
| Fluorescence method            | $2.7\times 10^2\text{--}2.7\times 10^6$ | $2.7\times 10^2$  | 6                |
| Fluorescence method            | $10\text{--}10^6$                       | 10                | 7                |
| Fluorescence method            | $2.6\times 10^1\text{--}5.2\times 10^6$ | 7                 | <b>This work</b> |

## References

- 1 C. Deng, H. Li, S. Qian, P. Fu, H. Zhou, J. Zheng and Y. Wang, *Anal. Chem.*, 2022, **94**, 11514-11520.
- 2 H. Zhang, S. Yao, X. Song, K. Xu, J. Wang, J. Li, C. Zhao and M. Jin, *TALANTA*, 2021, **232**.
- 3 B. Chen, Q. Tao, F. Qiao, Y. Fei, Y. Liu, X. Xiong and S. Liu, *Food Chem.*, 2022, **383**.
- 4 Q. Ouyang, L. Wang, W. Ahmad, Y. Yang and Q. Chen, *J. Agric. Food Chem.*, 2021, **69**, 9947-9956.
- 5 Y. Xu, H. Zheng, J. Sui, H. Lin and L. Cao, *FOODS*, 2023, **12**.
- 6 Z. Wang, X. Feng, F. Xiao, X. Bai, Q. Xu and H. Xu, *Microchem J.*, 2022, **178**, 107379.
- 7 S. Yao, C. Zhao, M. Shang, J. Li and J. Wang, *FOOD AND CHEMICAL TOXICOLOGY*, 2021, **150**.
